# Supplementary material for: Divalent carbon atom as the proton acceptor in hydrogen bonding
Source: Royal Society of Chemistry journal article supplement (doi:10.1039/b901968e), 2009-01-01
Supplement: b901968e.pdf [file b901968e.pdf]

*Physical Chemistry Chemical Physics*

Supporting Information for the paper:

**Divalent carbon atom as the proton acceptor in  
hydrogen bonding**

by

Mirosław Jabłoński<sup>†,\*</sup> and Marcin Palusiak<sup>‡,\*</sup>

<sup>†</sup> *Department of Quantum Chemistry, Faculty of Chemistry, Nicolaus Copernicus University,  
Gagarina 7, 87-100 Toruń, Poland*

<sup>‡</sup> *Department of Crystallography and Crystal Chemistry, University of Łódź, Pomorska  
149/153, 90-236 Łódź, Poland*

*e-mail: teojab@chem.uni.torun.pl, marcinp@uni.lodz.pl*

### **1. General information:**

Optimized geometries of the H-bonded complexes discussed in the paper are given together with the total energy calculated at the corresponding level of theory (page S7 and subsequent). Note, that optimizations with the use of DFT approximation were done with Opt=Tight option. This concerns both H-bonded complexes as well as monomers. Total energy given in hartrees, geometry in Å.

## 2. Interaction energy and counterpoise correction:

In the supermolecular approach the interaction energy,  $\Delta E$ , was calculated as the difference between the total energy of the complex ( $AB$ ) and the sum of total energies of isolated monomers ( $A$  and  $B$ ):

$$(1) \Delta E = E_{AB}^{AB}(AB) - [E_A^A(A) + E_B^B(B)].$$

where the subscripts refer to the basis set, the superscripts correspond to the geometry, and the label in parentheses denotes the system. To take into account the basis set superposition error [S. F. Boys and F. Bernardi, *Mol. Phys.*, 1970, **19**, 553.] the counterpoise correction and corrected interaction energy,  $\Delta E(\text{CP})$ , were also computed according to the equation:

$$(2) \Delta E(\text{CP}) = E_{AB}^{AB}(AB) - [E_{AB}^{AB}(A) + E_{AB}^{AB}(B)].$$

In calculations of  $\Delta E(\text{CP})$  the total energies of all systems were calculated using the basis set and geometry of the whole system  $AB$ . In the case of very strong interactions this may lead to a greater energy penalty caused by geometry distortions of subsystems from their isolated forms than energy gains due to the larger basis set. As a consequence,  $\Delta E(\text{CP})$  defined by eq. (2) can be obtained as lower (*i.e.* more negative) than  $\Delta E$ . To take this effect into account, the interaction energy containing the deformation correction was also computed by eq. 3:

$$(3) \Delta E(\text{BSSE}) = \Delta E + [E_A^{AB}(A) - E_{AB}^{AB}(A)] + [E_B^{AB}(B) - E_{AB}^{AB}(B)].$$

Thus,  $\Delta E(\text{BSSE})$  converges to  $\Delta E$  as the basis set approaches the complete basis set (CBS) limit. [S. S. Xantheas, *J. Chem. Phys.*, 1996, **104**, 8821.]

For all MP2 calculations the  $\Delta E > \Delta E(\text{CP})$  relation was always fulfilled (the interaction energy defined as negative value). In the case of DFT calculations  $\Delta E < \Delta E(\text{CP})$  were found for the strongest interactions. This results from the large energy loss due to the

strong geometry deformation of subsystems upon interaction. Nevertheless, this relation is opposite if the deformation correction is included in energy calculations (see eq. 3). The BSSE-corrected interaction energy obtained on the DFT level of theory was almost the same as the uncorrected counterpart (the difference being less than 0.2 kcal/mol). As shown in Table 1 for MP2/aug-cc-pVTZ the BSSE correction becomes more significant.

### **3. Interaction energy curves for C(NH<sub>3</sub>)<sub>2</sub> and C(PH<sub>3</sub>)<sub>2</sub> interacting with H<sup>+</sup> and the helium atom:**

To support conclusion, according to which proton accepting abilities of C(0) are greater in C(NH<sub>3</sub>)<sub>2</sub> as compared with those of C(PH<sub>3</sub>)<sub>2</sub> the interaction energy curves were calculated (DFT/aug-cc-pVTZ, C<sub>2v</sub> symmetry) for C(NH<sub>3</sub>)<sub>2</sub> and C(PH<sub>3</sub>)<sub>2</sub> interacting with H<sup>+</sup> and the helium atom (1s function as a contraction of 3 primitive GTOs was used to represent the basis set of H<sup>+</sup> and He). The very small basis set taken for He was meant to obtain mostly the repulsive contribution to the total interaction energy. These calculations showed that for C(NH<sub>3</sub>)<sub>2</sub> the attractive contribution is more significant than in the case of C(PH<sub>3</sub>)<sub>2</sub>. The two curves for the interaction with He are close to each other, whereas the interaction energy for H<sup>+</sup> is much lower in the case of [C(NH<sub>3</sub>)<sub>2</sub>⋯H]<sup>+</sup>. See Fig. 4(a,b) for graphical representations.

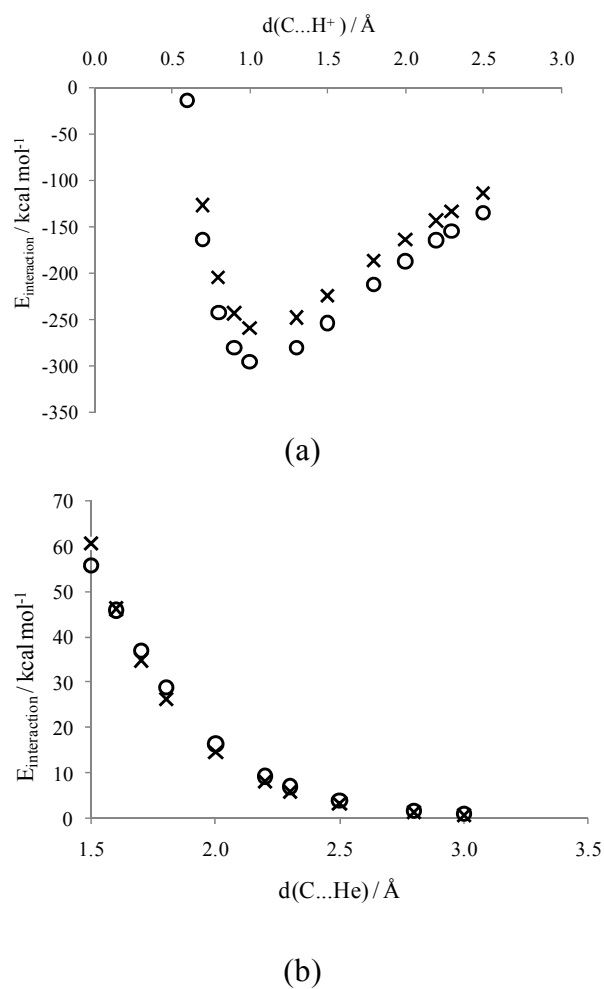

**Fig. S1.** Interaction energy curves (DFT/aug-cc-pVTZ,  $C_{2v}$  symmetry) for  $\text{C}(\text{NH}_3)_2$  (circles) and  $\text{C}(\text{PH}_3)_2$  (crosses) interacting with  $\text{H}^+$ , (a), and the helium atom, (b). 1s function as a contraction of 3 primitive GTOs has been used to represent the basis set of  $\text{H}^+$  and He. Circles and crosses correspond to data obtained for  $\text{C}(\text{NH}_3)_2$  and  $\text{C}(\text{PH}_3)_2$ , respectively.

#### 4. Optimized geometries and total energies of the H-bonded complexes discussed in the paper:

level: MP2/Aug-cc-pVTZ  
complex: (NH<sub>4</sub>)<sub>2</sub>C...HCF<sub>3</sub> (with two additional H-bonds)

|   |           |           |           |
|---|-----------|-----------|-----------|
| C | 0.034597  | -0.018786 | -0.049354 |
| N | -0.070083 | 0.119893  | 1.461784  |
| N | 1.546920  | -0.081620 | -0.200400 |
| H | 0.304591  | 0.988481  | 1.897346  |
| H | -1.072447 | 0.130153  | 1.630777  |
| H | 0.304619  | -0.662729 | 2.030020  |
| H | 2.029862  | -0.877209 | 0.257462  |
| H | 1.680883  | -0.213768 | -1.199389 |
| H | 2.096034  | 0.765624  | 0.054559  |
| H | -0.264627 | 2.229697  | -0.613796 |
| C | 0.249220  | 3.111240  | -0.217779 |
| F | 1.581436  | 2.981865  | -0.420610 |
| F | 0.069753  | 3.169752  | 1.122675  |
| F | -0.124627 | 4.287902  | -0.727264 |

E=-488.5739075

This Journal is © The Owner Societies

level: MP2/Aug-cc-pVTZ  
complex:  $(\text{NH}_4)_2\text{C}\dots\text{HCF}_3$  (with one additional H-bond)

|   |           |           |           |
|---|-----------|-----------|-----------|
| C | 0.057330  | 0.000000  | -0.666310 |
| N | -0.244452 | 0.000000  | 0.813995  |
| N | 1.562858  | 0.000000  | -0.646131 |
| H | 1.820020  | 0.000000  | -1.629694 |
| H | 2.034359  | 0.826952  | -0.225120 |
| H | 2.034359  | -0.826952 | -0.225120 |
| H | -1.263616 | 0.000000  | 0.860912  |
| H | 0.068443  | -0.826552 | 1.360638  |
| H | 0.068443  | 0.826552  | 1.360638  |
| H | -1.838993 | 0.000000  | -1.619114 |
| C | -2.914180 | 0.000000  | -1.419837 |
| F | -3.108471 | 0.000000  | -0.067093 |
| F | -3.540230 | 1.081679  | -1.899308 |
| F | -3.540230 | -1.081679 | -1.899308 |

E=-488.5757547



This Journal is © The Owner Societies

level: B3LYP/Aug-cc-pVTZ

complex:  $(\text{NH}_4)_2\text{C}\dots\text{HCF}_3$

|   |           |           |           |
|---|-----------|-----------|-----------|
| C | 0.001073  | 0.002998  | -0.004386 |
| F | -0.017153 | 0.018421  | 1.339207  |
| F | 1.317452  | -0.005028 | -0.385597 |
| F | -0.523569 | 1.162906  | -0.436075 |
| N | 1.237864  | -2.596913 | -2.089221 |
| C | -0.193955 | -2.638296 | -1.647109 |
| N | -0.693154 | -3.859441 | -2.343179 |
| H | -1.669547 | -3.927802 | -2.073041 |
| H | -0.686593 | -3.863148 | -3.396128 |
| H | -0.260130 | -4.783366 | -2.086583 |
| H | 1.626230  | -1.770003 | -1.638486 |
| H | 1.857124  | -3.395103 | -1.806386 |
| H | 1.425648  | -2.478693 | -3.115291 |
| H | -0.492677 | -0.877842 | -0.433153 |

E=-4 89.4598877

This Journal is © The Owner Societies

level: MP2/Aug-cc-pVTZ  
complex: (NH<sub>4</sub>)<sub>2</sub>C...HCCH

|   |           |           |           |
|---|-----------|-----------|-----------|
| C | 0.250129  | 0.353252  | -0.058624 |
| N | 0.204734  | 0.235832  | 1.442242  |
| N | 1.606203  | -0.226238 | -0.343049 |
| H | 1.703012  | -0.142560 | -1.351532 |
| H | 2.430505  | 0.266329  | 0.070387  |
| H | 1.756787  | -1.231360 | -0.123057 |
| H | -0.681519 | 0.677781  | 1.706674  |
| H | 0.179409  | -0.718544 | 1.846965  |
| H | 0.944872  | 0.741397  | 1.976570  |
| H | -1.356023 | 1.628921  | -0.057908 |
| C | -2.129930 | 1.987119  | 0.622938  |
| C | -2.918652 | 2.341447  | 1.481411  |
| H | -3.633988 | 2.666457  | 2.196550  |

E=-227.8895852

This Journal is © The Owner Societies

level: B3LYP/Aug-cc-pVTZ

complex: (NH<sub>4</sub>)<sub>2</sub>C...HCCH (with one additional H-bond)

|   |           |           |           |
|---|-----------|-----------|-----------|
| C | 0.249655  | 0.291686  | -0.008646 |
| N | 0.247729  | 0.128910  | 1.478736  |
| N | 1.607377  | -0.206585 | -0.366220 |
| H | 1.673214  | -0.077103 | -1.371190 |
| H | 2.440277  | 0.301865  | 0.048227  |
| H | 1.825653  | -1.217107 | -0.196254 |
| H | -0.640678 | 0.528063  | 1.786817  |
| H | 0.273947  | -0.839236 | 1.868731  |
| H | 0.995038  | 0.643672  | 2.018527  |
| H | -1.378493 | 1.646118  | 0.030511  |
| C | -2.175532 | 2.050270  | 0.652620  |
| C | -3.006244 | 2.472989  | 1.410760  |
| H | -3.756407 | 2.856291  | 2.056947  |

E=-228.4388617

This Journal is © The Owner Societies

level: MP2/Aug-cc-pVTZ  
complex: (NH<sub>3</sub>)<sub>2</sub>C...HCCH

|   |           |           |           |
|---|-----------|-----------|-----------|
| C | 0.129888  | 0.000000  | -0.043037 |
| N | -0.010529 | 0.000000  | 1.441083  |
| N | 1.610490  | 0.000000  | -0.202242 |
| H | 1.765056  | 0.000000  | -1.205947 |
| H | 2.145621  | 0.828547  | 0.170166  |
| H | 2.145621  | -0.828547 | 0.170166  |
| H | -1.012331 | 0.000000  | 1.609445  |
| H | 0.368588  | -0.828437 | 1.970815  |
| H | 0.368588  | 0.828437  | 1.970815  |
| H | -1.624919 | 0.000000  | -1.371717 |
| C | -2.551769 | 0.000000  | -1.934365 |
| C | -3.582742 | 0.000000  | -2.549519 |
| H | -4.492240 | 0.000000  | -3.096662 |

E= -228.4380736

This Journal is © The Owner Societies

level: MP2/Aug-cc-pVTZ  
complex: (PH<sub>3</sub>)<sub>2</sub>C...H<sub>2</sub>O

|   |           |           |           |
|---|-----------|-----------|-----------|
| C | -0.120393 | 0.373629  | 0.157085  |
| P | 0.095716  | 0.057787  | 1.772406  |
| P | 1.101343  | 0.118834  | -0.941988 |
| H | -1.108395 | 0.113228  | 2.486714  |
| H | 0.596658  | -1.192474 | 2.221365  |
| H | 0.891668  | 0.901373  | 2.588569  |
| H | 0.633076  | 0.193256  | -2.259627 |
| H | 2.209963  | 0.998377  | -1.020220 |
| H | 1.808647  | -1.110612 | -0.985717 |
| H | -1.709503 | -0.087486 | -0.898750 |
| O | -2.368549 | -0.345532 | -1.580213 |
| H | -2.913124 | 0.439490  | -1.685359 |

E= -799.5946051

This Journal is © The Owner Societies

level: B3LYP/Aug-cc-pVTZ

complex: (PH<sub>3</sub>)<sub>2</sub>C...H<sub>2</sub>O

|   |           |           |           |
|---|-----------|-----------|-----------|
| C | -0.010060 | -0.016717 | 0.012765  |
| P | 0.004543  | -0.011142 | 1.665594  |
| P | 1.303888  | -0.004964 | -0.990360 |
| O | -2.442590 | 1.189865  | -1.234571 |
| H | 0.932700  | 0.021055  | -2.347347 |
| H | 2.248901  | 1.065939  | -0.975210 |
| H | 2.230453  | -1.090680 | -1.007934 |
| H | -1.294522 | 0.007071  | 2.206127  |
| H | 0.563994  | -1.096912 | 2.404469  |
| H | 0.591493  | 1.059861  | 2.406237  |
| H | -1.650031 | 0.783504  | -0.818736 |
| H | -2.991536 | 0.446297  | -1.497676 |

E= -800.8439337

This Journal is © The Owner Societies

level: MP2/Aug-cc-pVTZ  
complex: (PH<sub>3</sub>)<sub>2</sub>C...HCF<sub>3</sub>

|   |           |           |           |
|---|-----------|-----------|-----------|
| C | 1.228091  | -0.142956 | -0.000006 |
| P | 1.506807  | 1.496687  | 0.000003  |
| P | 2.503809  | -1.206797 | -0.000010 |
| C | -2.047723 | -0.243656 | -0.000012 |
| F | -2.682144 | -0.712707 | 1.083534  |
| F | -2.176841 | 1.097096  | -0.000076 |
| F | -2.682301 | -0.712818 | -1.083420 |
| H | 2.077497  | -2.541864 | -0.000085 |
| H | 3.432222  | -1.252721 | -1.072954 |
| H | 3.432160  | -1.252837 | 1.072984  |
| H | 0.311586  | 2.227865  | -0.000132 |
| H | 2.184615  | 2.131036  | 1.073350  |
| H | 2.184859  | 2.131007  | -1.073209 |
| H | -0.992823 | -0.515318 | -0.000081 |

E= -1061.1086344

This Journal is © The Owner Societies

level: B3LYP/Aug-cc-pVTZ  
complex: (PH<sub>3</sub>)<sub>2</sub>C...HCF<sub>3</sub>

|   |           |           |           |
|---|-----------|-----------|-----------|
| C | -0.019103 | -0.004551 | 0.034355  |
| P | 0.021979  | 0.008635  | 1.686329  |
| P | 1.295027  | -0.013067 | -0.968287 |
| C | -2.971808 | -0.080338 | -1.649430 |
| F | -2.685874 | -0.398130 | -2.928772 |
| F | -3.827081 | -1.007808 | -1.177091 |
| F | -3.612090 | 1.104623  | -1.654400 |
| H | 0.927790  | -0.025522 | -2.327625 |
| H | 2.230739  | 1.066196  | -0.982372 |
| H | 2.232082  | -1.091257 | -0.963104 |
| H | -1.267409 | 0.012909  | 2.252664  |
| H | 0.604533  | -1.064045 | 2.428489  |
| H | 0.604028  | 1.093220  | 2.411422  |
| H | -2.060106 | -0.037503 | -1.046671 |

E=-1062.7552015



This Journal is © The Owner Societies

level: MP2/Aug-cc-pVTZ  
complex: (PH<sub>4</sub>)<sub>2</sub>C...HCN

|   |           |           |           |
|---|-----------|-----------|-----------|
| C | -0.072251 | 0.000001  | 0.093260  |
| P | 0.042305  | 0.000000  | 1.750056  |
| P | 1.275499  | 0.000000  | -0.878478 |
| C | -2.276073 | 0.000000  | -2.111390 |
| N | -2.960092 | -0.000001 | -3.059259 |
| H | 0.920086  | 0.000000  | -2.236151 |
| H | 2.200628  | 1.074155  | -0.862906 |
| H | 2.200627  | -1.074156 | -0.862906 |
| H | -1.217201 | 0.000000  | 2.363218  |
| H | 0.653671  | -1.073756 | 2.445761  |
| H | 0.653672  | 1.073755  | 2.445762  |
| H | -1.621489 | 0.000000  | -1.239104 |

E=-816.5260117

This Journal is © The Owner Societies

level: B3LYP/Aug-cc-pVTZ  
complex: (PH<sub>4</sub>)<sub>2</sub>C...HCN

|   |           |           |           |
|---|-----------|-----------|-----------|
| C | -0.008546 | 0.000000  | 0.016393  |
| P | 0.009755  | 0.000000  | 1.670662  |
| P | 1.314337  | 0.000000  | -0.977119 |
| C | -2.851337 | 0.000000  | -1.437426 |
| N | -3.869491 | 0.000000  | -1.968065 |
| H | 0.951733  | 0.000000  | -2.337567 |
| H | 2.248593  | 1.079003  | -0.972816 |
| H | 2.248593  | -1.079003 | -0.972816 |
| H | -1.289559 | 0.000000  | 2.212784  |
| H | 0.582698  | -1.078918 | 2.408747  |
| H | 0.582698  | 1.078918  | 2.408747  |
| H | -1.881815 | 0.000000  | -0.933330 |

E= -817.8410815

This Journal is © The Owner Societies

level: MP2/Aug-cc-pVTZ  
complex: (PH<sub>3</sub>)<sub>2</sub>C...HCCH

|   |           |           |           |
|---|-----------|-----------|-----------|
| C | 0.141900  | 0.000000  | -0.109817 |
| P | 0.191549  | 0.000000  | 1.550270  |
| P | 1.534460  | 0.000000  | -1.011464 |
| H | -1.101038 | 0.000000  | 2.097063  |
| H | 0.769099  | -1.073329 | 2.277220  |
| H | 0.769099  | 1.073329  | 2.277220  |
| H | 1.271692  | 0.000000  | -2.388212 |
| H | 2.462597  | 1.072659  | -0.947063 |
| H | 2.462597  | -1.072659 | -0.947063 |
| H | -2.063214 | 0.000000  | -0.283148 |
| C | -3.102381 | 0.000000  | -0.002072 |
| C | -4.270904 | 0.000000  | 0.331859  |
| H | -5.294697 | 0.000000  | 0.614883  |

E= -800.4246538

This Journal is © The Owner Societies

level: B3LYP/Aug-cc-pVTZ  
complex: (PH<sub>3</sub>)<sub>2</sub>C...HCCH

|   |           |           |           |
|---|-----------|-----------|-----------|
| C | -0.019984 | 0.017495  | 0.046730  |
| P | 0.037480  | 0.001891  | 1.695353  |
| P | 1.261028  | 0.003774  | -0.992593 |
| C | -3.140896 | 0.115108  | -1.313174 |
| C | -4.242969 | 0.150450  | -1.783340 |
| H | 0.855614  | 0.023144  | -2.341480 |
| H | 2.217421  | 1.065418  | -1.016854 |
| H | 2.178572  | -1.090997 | -1.036169 |
| H | -1.246273 | 0.020711  | 2.274966  |
| H | 0.606892  | -1.093603 | 2.415079  |
| H | 0.647014  | 1.062584  | 2.434073  |
| H | -2.152730 | 0.083572  | -0.890989 |
| H | -5.218817 | 0.181729  | -2.200030 |

E=-801.736351

# Electronic Supplementary Material for PCCP

This Journal is © The Owner Societies

level: B3LYP/Aug-cc-pVTZ  
complex: [(P(CH<sub>3</sub>)<sub>2</sub>C...H<sub>2</sub>O

|   |           |           |           |
|---|-----------|-----------|-----------|
| C | -0.012554 | -0.010940 | 0.000262  |
| P | 0.000653  | 0.005075  | 1.652694  |
| C | 1.630682  | -0.026169 | 2.522695  |
| P | 0.610858  | -1.033571 | -1.138006 |
| C | -0.077704 | -2.746171 | -1.246482 |
| C | 0.315255  | -0.379525 | -2.821095 |
| C | 2.430649  | -1.355820 | -1.129684 |
| C | -0.778834 | 1.534799  | 2.285905  |
| C | -0.932096 | -1.317917 | 2.546271  |
| O | -2.664167 | 0.944328  | -0.910290 |
| H | 0.696782  | -1.055063 | -3.586658 |
| H | -0.756155 | -0.238688 | -2.954483 |
| H | 0.804626  | 0.588831  | -2.910950 |
| H | 2.734347  | -1.966396 | -1.980954 |
| H | 2.956850  | -0.403176 | -1.163125 |
| H | 2.705100  | -1.872015 | -0.210322 |
| H | 0.328570  | -3.295416 | -2.096966 |
| H | 0.154784  | -3.288478 | -0.330519 |
| H | -1.160107 | -2.677685 | -1.343343 |
| H | -0.815545 | 1.546408  | 3.375223  |
| H | -0.209641 | 2.392017  | 1.930199  |
| H | -1.788104 | 1.599213  | 1.882205  |
| H | 1.510961  | 0.078218  | 3.601768  |
| H | 2.136471  | -0.968263 | 2.313994  |
| H | 2.247003  | 0.789210  | 2.147531  |
| H | -0.942863 | -1.150559 | 3.624230  |
| H | -1.954613 | -1.332609 | 2.172219  |
| H | -0.474926 | -2.285733 | 2.342501  |
| H | -1.765221 | 0.646665  | -0.615164 |
| H | -2.534908 | 1.842184  | -1.227843 |

E=-1036.8994911

# Electronic Supplementary Material for PCCP

This Journal is © The Owner Societies

level: B3LYP/Aug-cc-pVTZ  
complex: [(P(CH<sub>3</sub>))<sub>2</sub>C...HCF<sub>3</sub>]

|   |           |           |           |
|---|-----------|-----------|-----------|
| C | 0.063090  | 0.039800  | 0.018625  |
| P | 0.039488  | 0.018009  | 1.669901  |
| C | 1.638460  | -0.164641 | 2.582431  |
| P | 0.652927  | -1.020859 | -1.101282 |
| C | -0.097384 | -2.709854 | -1.200800 |
| C | 0.412515  | -0.383518 | -2.801035 |
| C | 2.459615  | -1.417444 | -1.075932 |
| C | -0.619727 | 1.590846  | 2.338047  |
| C | -1.017364 | -1.245798 | 2.510552  |
| C | -1.780236 | 2.542751  | -1.314812 |
| F | -2.384280 | 2.121265  | -2.446020 |
| F | -2.748992 | 2.908548  | -0.448313 |
| F | -1.068636 | 3.646061  | -1.619742 |
| H | 0.805340  | -1.075951 | -3.545400 |
| H | -0.650300 | -0.227890 | -2.978287 |
| H | 0.921591  | 0.574412  | -2.893831 |
| H | 2.746569  | -2.048826 | -1.917848 |
| H | 3.023019  | -0.486464 | -1.114640 |
| H | 2.706241  | -1.932956 | -0.148456 |
| H | 0.303027  | -3.283435 | -2.037901 |
| H | 0.101030  | -3.250046 | -0.275504 |
| H | -1.175323 | -2.607619 | -1.316309 |
| H | -0.643264 | 1.583237  | 3.427803  |
| H | 0.010078  | 2.410290  | 1.995349  |
| H | -1.627167 | 1.748311  | 1.956680  |
| H | 1.500004  | -0.076035 | 3.660705  |
| H | 2.072972  | -1.139060 | 2.361934  |
| H | 2.327542  | 0.606972  | 2.242878  |
| H | -1.041935 | -1.102754 | 3.591656  |
| H | -2.028467 | -1.172565 | 2.113132  |
| H | -0.632945 | -2.241982 | 2.293960  |
| H | -1.145335 | 1.756882  | -0.888601 |

E= -1298.8086084

This Journal is © The Owner Societies

level: B3LYP/Aug-cc-pVTZ  
complex: [(P(CH<sub>3</sub>))<sub>2</sub>C...HCN

|   |          |          |          |
|---|----------|----------|----------|
| C | -0.07375 | 0.0882   | -0.03427 |
| P | -0.01176 | 0.00643  | 1.61865  |
| C | 1.64586  | -0.03998 | 2.43539  |
| P | 0.4949   | -0.93669 | -1.20403 |
| C | -0.20929 | -2.6439  | -1.29521 |
| C | 0.14958  | -0.27367 | -2.87408 |
| C | 2.31094  | -1.277   | -1.27139 |
| C | -0.7897  | 1.48163  | 2.37115  |
| C | -0.88478 | -1.38727 | 2.4631   |
| H | -0.75146 | 1.43683  | 3.45927  |
| H | -0.26942 | 2.37446  | 2.02862  |
| H | -1.82775 | 1.54374  | 2.04894  |
| H | -0.85071 | -1.28733 | 3.54879  |
| H | -1.92259 | -1.40172 | 2.13411  |
| H | -0.41995 | -2.33134 | 2.18068  |
| H | 1.56208  | 0.00247  | 3.52202  |
| H | 2.16188  | -0.95827 | 2.15719  |
| H | 2.23404  | 0.80667  | 2.08513  |
| H | 0.52148  | -0.94348 | -3.64893 |
| H | -0.9248  | -0.14523 | -2.99432 |
| H | 0.62655  | 0.69923  | -2.9793  |
| H | 0.16973  | -3.19137 | -2.15914 |
| H | 0.04773  | -3.19252 | -0.38973 |
| H | -1.29384 | -2.57267 | -1.36025 |
| H | 2.57531  | -1.88732 | -2.13583 |
| H | 2.84436  | -0.32913 | -1.32246 |
| H | 2.61769  | -1.79831 | -0.36519 |
| H | -0.96063 | 1.77531  | -0.7603  |
| C | -1.44117 | 2.68872  | -1.15481 |
| N | -1.94054 | 3.63871  | -1.56529 |

E=-1053.8952917

level: B3LYP/Aug-cc-pVTZ  
complex: [(P(CH<sub>3</sub>)<sub>2</sub>C...HCCH

|   |           |           |           |
|---|-----------|-----------|-----------|
| C | 0.046242  | -0.015853 | 0.001669  |
| P | 0.022759  | -0.011193 | 1.649708  |
| C | 1.628874  | 0.096364  | 2.562869  |
| P | 0.629774  | 1.027377  | -1.132949 |
| C | -0.101827 | 2.725184  | -1.232614 |
| C | 2.441427  | 1.405096  | -1.138353 |
| C | 0.355852  | 0.382548  | -2.824923 |
| C | -0.980155 | 1.284455  | 2.510176  |
| C | -0.699715 | -1.562837 | 2.302252  |
| C | -1.591847 | -2.681280 | -1.326412 |
| C | -2.175271 | -3.619376 | -1.793428 |
| H | 0.745481  | 1.064878  | -3.580359 |
| H | 0.847964  | -0.583946 | -2.918261 |
| H | -0.711807 | 0.238650  | -2.981491 |
| H | 0.291153  | 3.288141  | -2.080480 |
| H | -1.182663 | 2.634539  | -1.329230 |
| H | 0.118747  | 3.268902  | -0.314471 |
| H | 2.722915  | 2.029730  | -1.987252 |
| H | 2.706606  | 1.921497  | -0.216391 |
| H | 2.994061  | 0.467823  | -1.181093 |
| H | -0.724008 | -1.566047 | 3.392066  |
| H | -1.711620 | -1.672780 | 1.916124  |
| H | -0.106703 | -2.404579 | 1.948759  |
| H | -1.004160 | 1.130427  | 3.589926  |
| H | -0.558610 | 2.267417  | 2.302261  |
| H | -1.995694 | 1.254589  | 2.118369  |
| H | 1.488731  | -0.000957 | 3.640251  |
| H | 2.286333  | -0.697145 | 2.211241  |
| H | 2.100504  | 1.055854  | 2.353152  |
| H | -1.068206 | -1.836479 | -0.906000 |
| H | -2.691105 | -4.450039 | -2.206839 |

E= -1037.7883362



This Journal is © The Owner Societies

level: MP2/Aug-cc-pVTZ

complex: F<sub>2</sub>C...H<sub>2</sub>O

|   |           |          |           |
|---|-----------|----------|-----------|
| C | 0.000000  | 0.000000 | 0.000000  |
| F | 0.000000  | 0.000000 | 1.296941  |
| F | 1.246671  | 0.000000 | -0.346787 |
| O | -2.159904 | 0.002337 | -2.342060 |
| H | -1.611228 | 0.000507 | -1.546569 |
| H | -3.062270 | 0.008807 | -2.012364 |

E= -313.7415698

This Journal is © The Owner Societies

level: B3LYP/Aug-cc-pVTZ

complex: F<sub>2</sub>C...H<sub>2</sub>O

|   |           |           |           |
|---|-----------|-----------|-----------|
| C | 0.005372  | -0.012262 | -0.006449 |
| F | -0.009847 | -0.015386 | 1.290328  |
| F | 1.261300  | 0.019432  | -0.338960 |
| O | -2.807862 | -0.089407 | -1.541432 |
| H | -1.905659 | -0.062770 | -1.193382 |
| H | -2.714400 | -0.079018 | -2.497939 |

E= - 314.2685972

This Journal is © The Owner Societies

level: MP2/Aug-cc-pVTZ

complex: F<sub>2</sub>C...HCF<sub>3</sub>

|   |           |           |           |
|---|-----------|-----------|-----------|
| C | 0.803294  | -0.101972 | 0.616056  |
| F | 0.633934  | -1.330383 | 0.997688  |
| F | 1.991486  | 0.222112  | 1.023978  |
| H | -0.894170 | 1.413720  | -0.666917 |
| C | -1.616029 | 2.074038  | -1.136587 |
| F | -1.004221 | 2.950573  | -1.941867 |
| F | -2.492328 | 1.376065  | -1.868783 |
| F | -2.298501 | 2.761912  | -0.213214 |

E= -575.2571609

This Journal is © The Owner Societies

level: B3LYP/Aug-cc-pVTZ

complex: F<sub>2</sub>C...HCF<sub>3</sub>

|   |           |           |           |
|---|-----------|-----------|-----------|
| C | -0.006274 | -0.002035 | 0.009838  |
| F | 0.067331  | -0.316734 | 1.269399  |
| F | 1.209967  | 0.298061  | -0.338755 |
| C | -3.095649 | 0.039531  | -2.157366 |
| F | -4.008373 | -0.840122 | -1.712457 |
| F | -3.654022 | 1.261520  | -2.154915 |
| F | -2.788748 | -0.279346 | -3.425761 |
| H | -2.206152 | 0.021843  | -1.530154 |

E= -576.1818116

This Journal is © The Owner Societies

level: MP2/Aug-cc-pVTZ

complex: Cl<sub>2</sub>C...H<sub>2</sub>O

|    |           |           |           |
|----|-----------|-----------|-----------|
| C  | 0.064615  | 0.042755  | -0.073994 |
| Cl | -0.127928 | -0.097200 | 1.605088  |
| Cl | 1.713715  | 0.009665  | -0.487836 |
| O  | -2.631361 | 0.295311  | -1.543298 |
| H  | -1.725681 | 0.222662  | -1.201681 |
| H  | -2.524005 | 0.356532  | -2.496139 |

E= -1033.6721813

This Journal is © The Owner Societies

level: B3LYP/Aug-cc-pVTZ

complex: Cl<sub>2</sub>C...H<sub>2</sub>O

|    |           |           |           |
|----|-----------|-----------|-----------|
| C  | -0.001201 | 0.000481  | 0.001381  |
| Cl | 0.001952  | -0.000779 | 1.721701  |
| Cl | 1.602555  | 0.000844  | -0.606835 |
| O  | -2.360140 | 0.005562  | -2.059445 |
| H  | -1.688825 | 0.003239  | -1.358385 |
| H  | -3.205932 | 0.003825  | -1.603122 |

E= -1034.951641

This Journal is © The Owner Societies

level: MP2/Aug-cc-pVTZ  
complex: Cl<sub>2</sub>C...HCF<sub>3</sub> (linear geometry)

|    |           |           |           |
|----|-----------|-----------|-----------|
| C  | -0.017004 | -0.220644 | 0.362533  |
| Cl | 0.864464  | -0.658797 | 1.751138  |
| Cl | 0.958366  | 0.710748  | -0.676229 |
| C  | -3.409225 | -1.139391 | -0.224035 |
| F  | -3.641880 | -2.372483 | 0.244607  |
| F  | -3.702420 | -1.130138 | -1.530944 |
| F  | -4.245665 | -0.295833 | 0.394722  |
| H  | -2.375257 | -0.851003 | -0.056951 |

E= -1295.1872849

This Journal is © The Owner Societies

level: MP2/Aug-cc-pVTZ

complex: Cl<sub>2</sub>C...HCF<sub>3</sub> (bent geometry)

|    |           |           |           |
|----|-----------|-----------|-----------|
| C  | 0.475173  | -0.232837 | 0.476882  |
| Cl | 0.974658  | -1.705332 | 1.173588  |
| Cl | 1.767460  | 0.874075  | 0.465395  |
| H  | -1.485698 | 1.011233  | -0.584446 |
| C  | -1.541043 | 2.021878  | -0.974273 |
| F  | -0.657493 | 2.189275  | -1.966773 |
| F  | -2.760623 | 2.297661  | -1.450651 |
| F  | -1.257754 | 2.910111  | -0.012744 |

E= -1295.1874047



This Journal is © The Owner Societies

level: B3LYP/Aug-cc-pVTZ

complex: Cl<sub>2</sub>C...HCF<sub>3</sub>

|    |           |           |           |
|----|-----------|-----------|-----------|
| C  | 0.007780  | 0.007347  | -0.011385 |
| Cl | -0.031529 | 0.053068  | 1.709906  |
| Cl | 1.635470  | -0.075627 | -0.567951 |
| C  | -3.011370 | -0.003821 | -2.093330 |
| F  | -2.808604 | 0.543140  | -3.304286 |
| F  | -3.421829 | -1.271598 | -2.270338 |
| F  | -4.000904 | 0.675337  | -1.488057 |
| H  | -2.100383 | 0.026870  | -1.496889 |

E= -1296.8644691

This Journal is © The Owner Societies

level: MP2/Aug-cc-pVTZ  
complex: imidazol-2-ylidene...H2O

|   |           |           |           |
|---|-----------|-----------|-----------|
| C | -0.000019 | -0.004859 | -0.006456 |
| N | -0.013139 | 0.034746  | 1.369178  |
| C | 1.224480  | 0.048962  | 1.937197  |
| N | 2.016302  | 0.018244  | 0.829204  |
| C | 1.317571  | -0.014728 | -0.359773 |
| O | -0.493984 | -0.075504 | 4.188423  |
| H | 3.019213  | 0.017219  | 0.897953  |
| H | -0.833072 | 0.046617  | 1.959771  |
| H | 1.787102  | -0.041714 | -1.326065 |
| H | -0.887747 | -0.022668 | -0.611753 |
| H | 0.383625  | -0.018393 | 3.752942  |
| H | -0.462533 | 0.579739  | 4.890506  |

E= -302.0934286

This Journal is © The Owner Societies

level: B3LYP/Aug-cc-pVTZ

complex: imidazol-2-ylidene...H2O

|   |           |           |           |
|---|-----------|-----------|-----------|
| C | -0.000474 | -0.001341 | 0.000236  |
| C | 0.001065  | -0.000555 | 1.351698  |
| N | 1.334478  | 0.002113  | 1.726891  |
| C | 2.193384  | 0.005400  | 0.676498  |
| N | 1.336031  | 0.002066  | -0.376204 |
| O | 4.157037  | 0.189808  | 2.762638  |
| H | 1.657801  | 0.005701  | -1.327035 |
| H | 1.682008  | 0.008898  | 2.672506  |
| H | -0.813553 | -0.003961 | -0.701817 |
| H | -0.812656 | -0.001499 | 2.053004  |
| H | 3.820563  | 0.118178  | 1.842022  |
| H | 4.869203  | -0.451454 | 2.829911  |

E=-302.7439202

This Journal is © The Owner Societies

level: MP2/Aug-cc-pVTZ  
complex: imidazol-2-ylidene...HCF3

|   |           |           |           |
|---|-----------|-----------|-----------|
| C | 0.089840  | -0.200624 | -0.201333 |
| N | -0.322665 | 0.289725  | 1.020157  |
| C | 0.692563  | 0.559942  | 1.889734  |
| N | 1.769638  | 0.205605  | 1.130420  |
| C | 1.449903  | -0.254897 | -0.128693 |
| H | 2.706492  | 0.286614  | 1.491079  |
| H | -1.283492 | 0.443862  | 1.272615  |
| H | 2.179306  | -0.574034 | -0.850476 |
| H | -0.582980 | -0.463253 | -0.997056 |
| H | 1.703241  | 1.265879  | 3.911851  |
| C | 2.700067  | 1.365742  | 4.334015  |
| F | 2.864594  | 0.609459  | 5.424454  |
| F | 3.616608  | 0.964018  | 3.420798  |
| F | 2.986702  | 2.631223  | 4.657570  |

E= -563.6062225

This Journal is © The Owner Societies

level: B3LYP/Aug-cc-pVTZ  
complex: imidazol-2-ylidene...HCF3

|   |           |           |           |
|---|-----------|-----------|-----------|
| C | -0.014131 | 0.019108  | 0.009322  |
| C | 0.017113  | -0.018818 | 1.358595  |
| N | 1.361948  | -0.031740 | 1.702004  |
| C | 2.201376  | -0.003748 | 0.632939  |
| N | 1.313439  | 0.027288  | -0.395999 |
| C | 5.673782  | -0.002037 | 0.724830  |
| F | 6.207556  | 1.027517  | 0.037917  |
| F | 6.068864  | 0.113267  | 2.009488  |
| F | 6.202816  | -1.140313 | 0.234280  |
| H | 1.611401  | 0.053723  | -1.354408 |
| H | 1.704036  | -0.058732 | 2.645627  |
| H | -0.843024 | 0.040300  | -0.673633 |
| H | -0.779335 | -0.037147 | 2.079205  |
| H | 4.583643  | -0.006313 | 0.649573  |

E= -564.6540572
